# Supplementary material for: Driving selective aerobic oxidation of alkyl aromatics by sunlight on alcohol grafted metal hydroxides
Source: Royal Society of Chemistry journal article supplement (doi:10.1039/c2sc20114c), 2012-01-01
Supplement: c2sc20114c_addcorr.doc [file c2sc20114c_addcorr.doc]

Addition and correction for Chemical Science

**Driving selective aerobic oxidation of alkyl aromatics by sunlight on alcohol grafted metal hydroxides**

Sarina Sarina, Huaiyong Zhu, Zhanfeng Zheng, Steven Bottle, Jin Chang, Xuebin Ke, Jin-Cai Zhao,Yining Huang, Andre Sutrisno, Mathew Willans and Guoran Li

*Chem. Sci.*, 2012, **3**, 2138−2146 (DOI: 10.1039/c2sc20114c)

Fig. 1 and Scheme 1 are incorrect in the manuscript. The corrected versions are shown below.


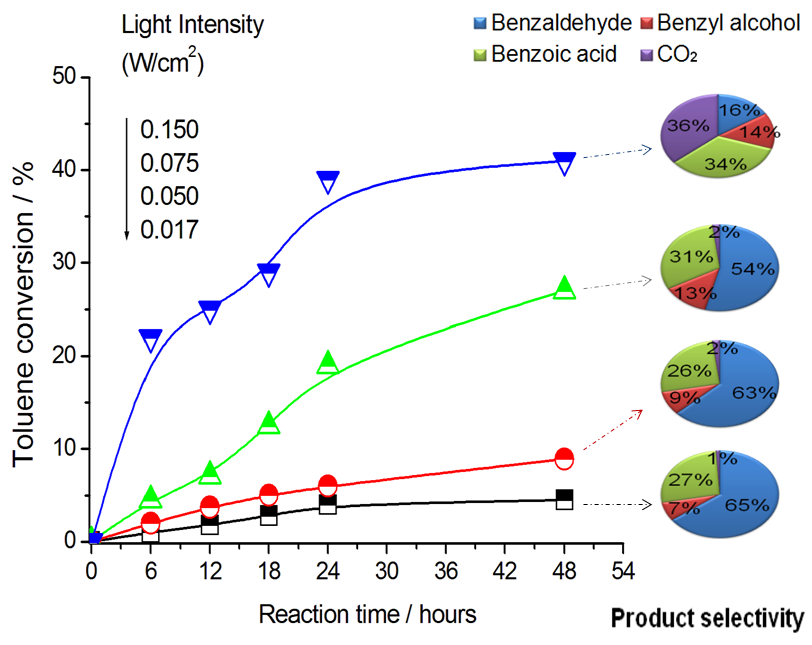


**Fig. 1** Oxidation of toluene under UV light irradiation of various intensities.


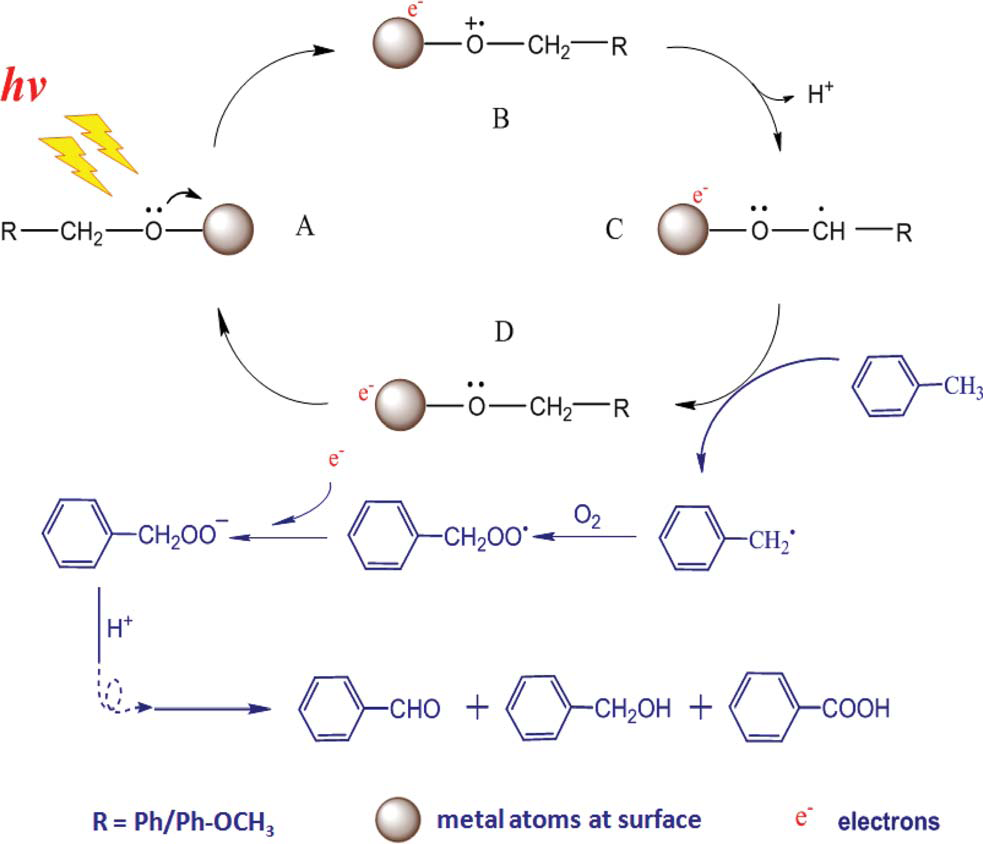


**Scheme 1** Proposed pathways of the reaction mechanism. Ph–CH3 as a reactant example.

The Royal Society of Chemistry apologises for this error and any consequent inconvenience to authors and readers.

**Additions and corrections can be viewed online by accessing the original article to which they apply.**
